# Supplementary material for: Slit2 inhibits SRC-PI3K signaling pathway, regulates osteoclast differentiation of macrophages and reduces bone resorption
Source: Frontiers journal article supplement (doi:10.3389/fcell.2025.1632882), 2025-08-26
Supplement: Supplementary_file_1.pdf [file Supplementary_file_1.pdf]

## 1 Supplementary materials

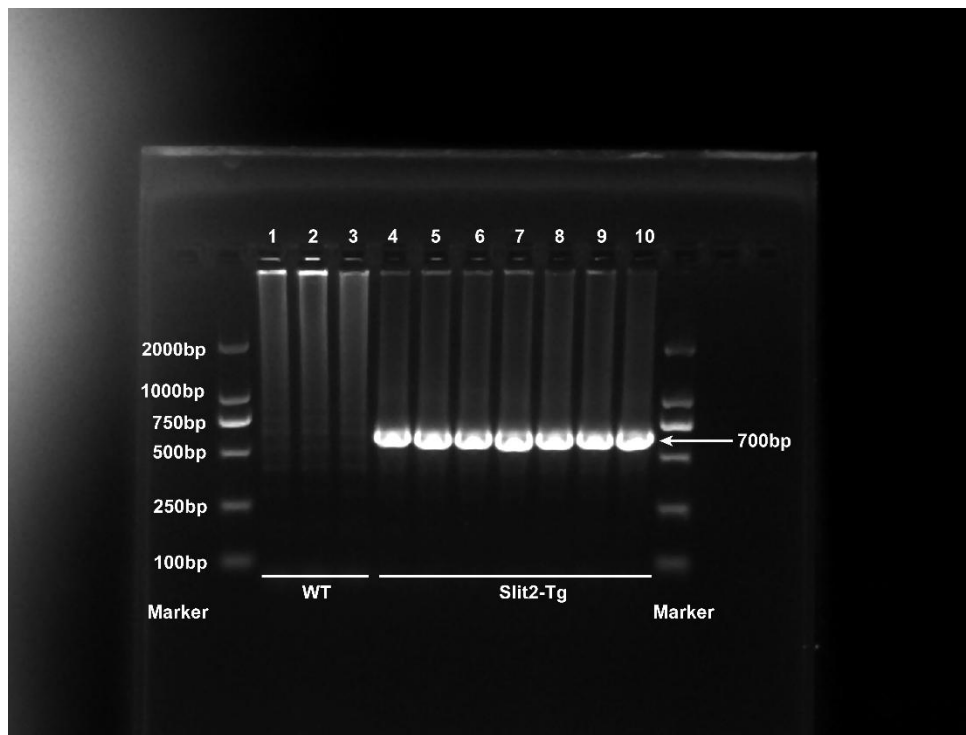

2

3 **Supplementary figure 1.** Agarose gel electrophoresis images of mouse gene identification.

4
